# Supplementary material for: Racial and Ethnic Disparities in Treatment and Treatment Type for Depression in a National Sample of Medicaid Recipients
Source: Atypon-hosted journal article supplement (doi:10.1176/appi.ps.201900407), 2020-04-02
Supplement: appi.ps.201900407.ds001.pdf [file appi.ps.201900407.ds001.pdf]

## Appendices

### Appendix A. Prescription drugs for Depression Treatment

| Class                                                    | Name                                     |
|----------------------------------------------------------|------------------------------------------|
| Tricyclic antidepressants                                | Amitriptyline (Elavil)                   |
|                                                          | Imipramine (Tofranil)                    |
|                                                          | Desipramine (Norpramin, Pretrofan)       |
|                                                          | Clomipramine (Anafranil)                 |
|                                                          | Maprotiline (Ludiomil)                   |
|                                                          | Doxepin (Sinequan)                       |
|                                                          | Nortriptyline (Pamelor)                  |
| Selective serotonin reuptake inhibitor                   | Fluoxetine (Prozac)                      |
|                                                          | Fluvoxamine (Luvox)                      |
|                                                          | Paroxetine (Paxil)                       |
|                                                          | Paroxetine CR (Paxil CR)                 |
|                                                          | Sertraline (Zoloft, Lustral)             |
|                                                          | Citalopram (Celexa, Cipramil)            |
|                                                          | Escitalopram (Lexapro)                   |
| Serotonin and norepinephrine reuptake inhibitors & Other | Bupropion (Wellbutrin, Zyban, Budeprion) |
|                                                          | Mirtazepine (Remeron)                    |
|                                                          | Duloxetine (Cymbalta)                    |
|                                                          | Venlafaxine (Effexor)                    |
|                                                          | Nefazodone (Serzone)                     |
|                                                          | Trazodone (Desyrel)                      |
|                                                          | Amoxapine (Asendin)                      |
|                                                          | Desvenlafaxine (Prestiq)                 |
|                                                          | Aplezin                                  |
| Monoamine oxidase inhibitor                              | Phenelzine (Nardil)                      |
|                                                          | Tranylcypromine (Parnate)                |
|                                                          | Isocarboxazid (Marplan)                  |
|                                                          | Selegeline oral (Deprenyl)               |
|                                                          | Selegeline transdermal (Emsam)           |

### Appendix B. Current Procedural Terminology (CPT) Codes for Depression Therapy

| CPT Codes                                                                                                                                                                     |
|-------------------------------------------------------------------------------------------------------------------------------------------------------------------------------|
| 90791, 90792, 90832, 90834, 90837, 90847, 90853, 96101, 96102, 96103, 96105, 96111, 96116, 96118, 96119, 96120, 96150, 96151, 96152, 96153, 96154, 96155, 90785, 90839, 90840 |
